# Supplementary material for: International multiphase mixed methods study protocol to develop a patient-reported outcome instrument for children and adolescents with lower limb deformities
Source: PubMed Central journal article supplement — BMJ Open. 2019 May 5;9(5):e027079. doi: 10.1136/bmjopen-2018-027079 (PMC6502042; doi:10.1136/bmjopen-2018-027079), 2019-05-05

# BMJ Open

BMJ Open is committed to open peer review. As part of this commitment we make the peer review history of every article we publish publicly available.

When an article is published we post the peer reviewers' comments and the authors' responses online. We also post the versions of the paper that were used during peer review. These are the versions that the peer review comments apply to.

The versions of the paper that follow are the versions that were submitted during the peer review process. They are not the versions of record or the final published versions. They should not be cited or distributed as the published version of this manuscript.

BMJ Open is an open access journal and the full, final, typeset and author-corrected version of record of the manuscript is available on our site with no access controls, subscription charges or pay-per-view fees (<http://bmjopen.bmj.com>).

If you have any questions on BMJ Open's open peer review process please email [info.bmjopen@bmj.com](mailto:info.bmjopen@bmj.com)

# BMJ Open

## An international multiphase mixed methods study protocol to develop a patient-reported outcome instrument for children and adolescents with lower limb deformities

|                               |                                                                                                                                                                                                                                                                                                                                                          |
|-------------------------------|----------------------------------------------------------------------------------------------------------------------------------------------------------------------------------------------------------------------------------------------------------------------------------------------------------------------------------------------------------|
| Journal:                      | <i>BMJ Open</i>                                                                                                                                                                                                                                                                                                                                          |
| Manuscript ID                 | bmjopen-2018-027079                                                                                                                                                                                                                                                                                                                                      |
| Article Type:                 | Protocol                                                                                                                                                                                                                                                                                                                                                 |
| Date Submitted by the Author: | 15-Oct-2018                                                                                                                                                                                                                                                                                                                                              |
| Complete List of Authors:     | Chhina, Harpreet; BC Children's Hospital, Orthopaedics; University of British Columbia Faculty of Medicine, Experimental Medicine Klassen, Anne; McMaster University, Pediatrics Kopec, Jacek; Arthritis Research Centre of Canada, Oliffe, John; University of British Columbia School of Nursing Cooper, Anthony; BC Children's Hospital, Orthopaedics |
| Keywords:                     | Patient Reported Outcomes, Health Related Quality of life, Psychometrics, Lower Limb Deformities, Mixed Methods, QUALITATIVE RESEARCH                                                                                                                                                                                                                    |
|                               |                                                                                                                                                                                                                                                                                                                                                          |

SCHOLARONE™  
Manuscripts

**TITLE PAGE**

**Title:** An international multiphase mixed methods study protocol to develop a patient-reported outcome instrument for children and adolescents with lower limb deformities

**Running Title:** Patient-reported outcome instrument for lower limb deformities

**Manuscript Type:** Study Protocol

**Abstract Word Count:** 300

**Manuscript Word Count:** 3154

**Name and order of Authors**

<sup>1,2</sup>Harpreet CHHINA, MSc

[hchhina@cw.bc.ca](mailto:hchhina@cw.bc.ca)

<sup>3</sup>Anne KLASSEN, BA, DPhil

[aklass@mcmaster.ca](mailto:aklass@mcmaster.ca)

<sup>4,5</sup>Jacek KOPEC, MD, MSc, PhD

[jkopec@arthritisresearch.ca](mailto:jkopec@arthritisresearch.ca)

<sup>6</sup>John L. OLIFFE, RN, Med, PhD

[John.Oliffe@nursing.ubc.ca](mailto:John.Oliffe@nursing.ubc.ca)

<sup>1,2,7</sup>Anthony COOPER, MBChB, FRCSC

[anthony.cooper@cw.bc.ca](mailto:anthony.cooper@cw.bc.ca)

**Author Affiliations**

<sup>1</sup>Department of Experimental Medicine, Faculty of Medicine, University of British Columbia

<sup>2</sup>BC Children's Hospital, Vancouver BC

<sup>3</sup>Department of Pediatrics, McMaster University

Clinical Epidemiology & Biostatistics McMaster University

Hamilton, ON Canada

<sup>4</sup>Research Centre of Canada, Richmond, BC, Canada

<sup>5</sup>School of Population and Public Health, University of British Columbia

Vancouver, BC Canada

<sup>6</sup>School of Nursing, University of British Columbia

Vancouver BC Canada

<sup>7</sup>Department of Orthopaedics, UBC

**Corresponding Author:** Anthony Cooper

1D 18 4480 Oak Street

BC Children's Hospital,

Vancouver BC V6H 2M2

Phone Number: 604-875-2000 ext. 6008

Fax Number: 604-875-2275

Email: [anthony.cooper@cw.bc.ca](mailto:anthony.cooper@cw.bc.ca)

**Keywords:** Patient reported outcome instrument, lower limb deformities, orthopaedics, qualitative research, mixed methods, children, adolescents, health related quality of life, psychometrics

**Institution where work was performed:** BC Children's Hospital, Vancouver BC, Canada

1  
2  
3 **Source of Funding:** Orthopaedics Research Excellence Funds, Department of Orthopaedics, University of  
4 British Columbia; Canadian Orthopaedics Association  
5

6 **Ethics:** This study is approved by Research Ethics Boards for each of the participating sites (CW15-  
7 0215/H15-00514, FWA 00004545, IEC-01/2017-579  
8  
9  
10  
11  
12  
13  
14  
15  
16  
17  
18  
19  
20  
21  
22  
23  
24  
25  
26  
27  
28  
29  
30  
31  
32  
33  
34  
35  
36  
37  
38  
39  
40  
41  
42  
43  
44  
45  
46  
47  
48  
49  
50  
51  
52  
53  
54  
55  
56  
57  
58  
59  
60

For peer review only

**Abstract**

**Title:** An international multiphase mixed methods study protocol to develop a patient-reported outcome instrument for children and adolescents with lower limb deformities.

**Introduction:** Our recent systematic review has indicated the lack of a patient-reported outcome (PRO) instrument to measure HRQOL of children and adolescents with lower limb deformities. We are developing a PRO instrument which will be applicable internationally across various countries. This manuscript describes our approach to the development of a new PRO instrument for measuring HRQOL for children and adolescents with lower limb deformities.

**Methods and Analysis:** Three phases in the development of this PRO instrument are as described: 1) This phase involves the development of a conceptual framework of HRQOL and item pool that is used to inform a set of preliminary scales. We have developed a preliminary conceptual framework of HRQOL based on our systematic review. Qualitative interviews are being conducted at five sites in Canada, Ethiopia, India and the USA. An item pool will be generated from this qualitative phase. The preliminary items and scales will be sent out to children at the five participating centres. Cognitive debriefing interviews will gather detailed feedback on the items from the children. Expert opinion will be sought from clinicians from the participating centres. 2) During this phase, an international field-test study will be conducted to refine the scales and examine their psychometric properties. 3) During this phase, tests of reliability, validity and responsiveness will be conducted. Phases 1 will also involve translations and cultural adaptations.

At the end of this study, we expect to produce an internationally applicable PRO instrument which is scientifically sound and clinically relevant to the lower limb deformity population.

1  
2  
3 **Ethics and dissemination:** This study is approved by Research Ethics Boards for each of the participating  
4 sites. Results of this study will be published in peer-reviewed journals and presented at national and  
5 international conferences. An integrated knowledge translation approach is applied to engage patients,  
6 families and clinicians from the start of the study.  
7  
8  
9  
10  
11  
12  
13  
14

## 15 **Article Summary**

### 16 **Strengths and Limitations:**

- 17 • International, multicentre, study including patients from high-income and lower-middle income  
18 countries. This will ensure international applicability of this PRO instrument for children and  
19 adolescents with lower limb deformities
- 20 • Rigorous qualitative component of this study will ensure content validity of this PRO instrument.
- 21 • Adherence to rigorous guidelines of PRO instrument development and the use of modern  
22 psychometric methods will make this PRO instrument as scientifically sound and clinically relevant  
23 as possible.
- 24 • A long time period to completion is needed since this study involves multiple iterative steps  
25 involving patients and clinicians from high-income and lower-middle income countries.  
26  
27  
28  
29  
30  
31  
32  
33  
34  
35  
36  
37  
38  
39  
40  
41  
42  
43  
44  
45  
46  
47  
48  
49  
50  
51  
52  
53  
54  
55  
56  
57  
58  
59  
60

1  
2  
3 **Title:** An international multiphase mixed methods study protocol to develop a patient-reported outcome  
4 instrument for children and adolescents with lower limb deformities.  
5  
6  
7  
8  
9  
10

11 **Introduction:** The growing trend towards patient-centered care has led to increased development of  
12 patient reported outcome (PRO) instruments. PRO instruments measure concepts that matter to  
13 patients (eg, health-related quality of life, symptoms and function) from their perspective.<sup>[1]</sup> Guidelines  
14 exist to inform the development of a new PRO instrument, which can be a lengthy, rigorous and  
15 iterative process.<sup>[2-6]</sup> Most PRO instruments are developed in one language and a single country.  
16 Subsequent versions are then translated and adapted for use in other countries when needed.<sup>[2,7]</sup> A  
17 methodologically stronger approach for internationally applicable measures is to develop a new PRO  
18 instrument internationally from the start. In this approach, both the qualitative data used to develop  
19 scales, and subsequent analysis to refine the scales, can be used to ensure that final content of a new  
20 PRO instrument covers the concerns of patients in different contexts and cultures.  
21  
22  
23  
24  
25  
26  
27  
28  
29  
30  
31  
32  
33  
34  
35  
36  
37

38 A systematic review indicated that no PRO instrument, exists to measure health-related quality of life  
39 (HRQOL) for children and adolescents with lower limb deformities.<sup>[8]</sup> HRQOL is a multidimensional  
40 concept that measures a subject's perception of the effects of illness and/or treatment(s) on their daily  
41 life, well-being, physical, psychological and social functioning.<sup>[3,9-11]</sup> To address this gap, our aim is to  
42 develop an internationally applicable PRO instrument to measure HRQOL of children and adolescents  
43 with lower limb deformities. In this article, we describe our methodology and progress to date.  
44  
45  
46  
47  
48  
49  
50  
51  
52  
53  
54  
55  
56  
57  
58  
59  
60

1  
2  
3 **Methods:** We adhere to best practice guidelines for development of PRO instruments.<sup>[2-4,10-12]</sup> Our team  
4 follows a mixed methods iterative approach (see Figure 1).<sup>[13]</sup> The qualitative phase will ensure that the  
5 items generated are grounded in the experiences of the children and adolescents with lower limb  
6 deformities and the psychometric analysis will determine how well the items measure the construct of  
7 interest(COI). Three iterative and interactive phases involved include the following: 1) development of a  
8 conceptual framework of HRQOL and item pool that is used to information a set of preliminary scales; 2)  
9 an international field-test study to refine the scales and examine their psychometric properties ; and 3)  
10 further tests of reliability, validity and responsiveness ( Figure 1).  
11  
12  
13  
14  
15  
16  
17  
18  
19  
20  
21

22 **Patient and Public Involvement:** There was no direct patient and public involvement during the protocol  
23 development. However, this study itself involves direct patient engagement.  
24  
25  
26  
27  
28  
29

30 **Phase 1:** what should we measure?  
31  
32

33 This phase involves the development of a conceptual framework and generation of an item pool to  
34 inform scale development. This phase will establish content validity of the new instrument.<sup>[4,10]</sup> This  
35 phase has three steps as explained below.  
36  
37  
38  
39  
40  
41  
42  
43

44 **Step 1** involves development of a conceptual framework of HRQOL for children and adolescents with  
45 lower limb deformities (in progress).  
46  
47  
48  
49  
50  
51  
52  
53  
54  
55  
56  
57  
58  
59  
60



1  
2  
3 **Systematic review:** We performed a systematic review to identify PRO instruments used to measure the  
4  
5 HRQOL of children and adolescents with lower limb deformities. Findings were used to develop a  
6  
7 preliminary conceptual framework.<sup>[8]</sup>  
8  
9

10  
11  
12  
13  
14 **Qualitative interviews:** Rigorous qualitative research is a crucial foundation in the development of PRO  
15  
16 instruments.<sup>[14]</sup>  
17  
18  
19  
20  
21

22 **Recruitment:** Participants are being recruited from 5 orthopaedic centres in high-income (Canada – two  
23  
24 centres and USA), lower-middle income (India) and low-income countries (Ethiopia). Our aim is to recruit  
25  
26 a maximum variation sample that differs by type of lower limb deformities, type and stage of treatment,  
27  
28 age, gender and country. All interviews at one Canadian and one US English speaking centre and one  
29  
30 Indian Hindi/Punjabi speaking centre are conducted by one lead interviewer at the main study site ).  
31  
32 Interviews at the French speaking Canadian centre and Amharic speaking Ethiopian centre are  
33  
34 conducted by local interviewers trained by the lead interviewer at the main study site to ensure  
35  
36 uniformity during the interview process.  
37  
38  
39  
40  
41

42 **Inclusion and exclusion criteria:** Participants are aged 8 to 18 years with any of the following congenital  
43  
44 or acquired lower limb conditions: lower limb reduction defects, leg length discrepancy, and associated  
45  
46 angular and rotational deformities. Isolated knee, foot and ankle conditions without any limb length  
47  
48 discrepancy or limb deformity are not included. Children and adolescents with comorbidities that may  
49  
50 have confounding effects on their HRQOL, and/or cognitive or developmental delay that may affect their  
51  
52 ability to communicate are excluded from this study.  
53  
54  
55  
56  
57  
58  
59  
60

1  
2  
3 An interview guide with open-ended questions and probes covering concepts from other PRO  
4 instruments identified in the systematic review was developed.<sup>[8]</sup> The interview guide is modified after  
5 each interview as needed to include new themes that are then raised in subsequent interviews. The  
6 interview guide was prepared in English and translated into Amharic and Hindi/Punjabi. Interviews will  
7 be conducted until data saturation.<sup>[15]</sup>  
8  
9  
10  
11  
12  
13  
14  
15  
16

17 **Data Collection:** Parent consent and participant assent is obtained from each family. Demographic (age,  
18 gender, ethnicity) and clinical (diagnosis, type and stage of treatment) data are collected for each  
19 participant. Individual face-to-face interviews are conducted with the participant and parent(s) where  
20 possible. Interviews are audio-recorded and transcribed/translated into English.  
21  
22  
23  
24  
25  
26  
27  
28  
29

30 Participants from the main study site in Canada are also invited to take part in photo elicitation  
31 interview (PEI) whereby they are invited to take pictures to show how their life is affected by their leg  
32 condition. These PEI using participant produced photographs will help us overcome any age related  
33 linguistic and cognitive barriers in our young participants.<sup>[16]</sup>  
34  
35  
36  
37  
38  
39  
40  
41  
42

43 **Data Analysis:** The qualitative methodology used is interpretive description (ID). ID is a 'non-categorical  
44 methodological approach' that acknowledges the theoretical and practical knowledge that the  
45 researchers bring to a project to generate relevant knowledge for a clinical context.<sup>[17,18]</sup> The underlying  
46 qualitative paradigm is 'pragmatism' which means that an individual's (patients' and/or caregivers')  
47 understanding of a concept is of greatest importance in understanding the impact of their condition on  
48 their HRQOL, regardless of the clinical explanations.<sup>[19]</sup>  
49  
50  
51  
52  
53  
54  
55  
56  
57  
58  
59  
60

1  
2  
3  
4  
5 Interviews in English are transcribed verbatim. Interviews in other languages are transcribed and  
6 translated into English. All data are analysed by one researcher at the main study site. A line-by-line  
7 approach is used to code the data, with constant comparison methods to identify and categorize the  
8 concepts of interest (COI). The identified concepts are categorised into overarching top-level domains  
9 and subdomains. Data collection and analysis is being conducted concurrently and iteratively. The  
10 preliminary conceptual framework is revised based on the analyses.  
11  
12  
13  
14  
15  
16  
17  
18  
19  
20

21 **Rigour:** The truth value, applicability, consistency and neutrality will be assessed to establish rigour for  
22 the qualitative phase.<sup>[20,21]</sup> We use member checking as a way of establishing the truth value and  
23 credibility of our results. The applicability of the results will be determined in terms of fittingness of the  
24 quotations from the study participants to the scales derived from this data.<sup>[20]</sup> The scales will be taken  
25 back to the study participants for their feedback. The consistency of the qualitative findings will be  
26 evaluated by their auditability. Auditability will be maintained by keeping a clear decision trail during  
27 analysis. We will use confirmability as the criterion for neutrality, which means that we will be reflexive  
28 about the research process and the findings  
29  
30  
31  
32  
33  
34  
35  
36  
37  
38  
39  
40  
41

42 **Step 2** will involve item generation and scale development.  
43  
44  
45  
46  
47

48 **Item Generation:** Coded qualitative data will be used to generate a comprehensive item pool. In  
49 developing draft items, the wordings of patients will be used as much as possible to ensure that the  
50 items will resonate well with them. The item pool will be analysed to identify common/unique issues  
51 and how these vary by age (child vs adolescents), leg condition and country. We will follow guidelines in  
52  
53  
54  
55  
56  
57  
58  
59  
60

1  
2  
3 regards to appropriate health related vocabulary, reading level, response scale, response options, recall  
4  
5 period, length of instrument.<sup>[12,22–25]</sup> We will use the item pool to create independently functioning  
6  
7 scales that act like ‘rulers’ where the items map out a clinical hierarchy for each of the COI.  
8  
9

10  
11  
12  
13  
14 **Step 3** will involve clinical input, cognitive debriefing interviews, and refining the scales.  
15

16  
17  
18  
19  
20 **Clinician Input:** Clinicians ( orthopaedic surgeons, nurses, occupational therapists, physiotherapists and  
21  
22 psychologists) and other experts (experts in HRQOL studies and measurement) will be invited to provide  
23  
24 feedback on the scales using a Research Electronic Data Capture (REDCap) survey.  
25  
26

27  
28  
29  
30  
31 **Cognitive Debriefing Interviews:** Cognitive debriefing interviews with participants will be conducted to  
32  
33 determine if patients understand the instructions, response options and items of the new HRQOL  
34  
35 instrument and to identify missing content. Participants will review the HRQOL instrument with the  
36  
37 interviewer using the ‘Think Aloud’ technique with verbal probing.<sup>[26,27]</sup> Interviews will take place in a  
38  
39 series of rounds to allow time to make changes to the instrument and then obtain feedback on those  
40  
41 changes. Interviews will start in English centres and continue until no further changes are needed.  
42

43  
44 Translated versions (pragmatic translations) of items and scales will be created (one country at a time)  
45  
46 and cognitive debriefing interviews will be conducted in turn in French, Amharic, Hindi/Punjabi.  
47  
48

49  
50  
51 **Translation and cultural adaption (TCA):** We will follow the principles of good practice for TCA for PRO  
52  
53 instruments.<sup>[2,7,28]</sup> The first step will involve 2 independent forward translations from English into each  
54  
55 target language (Canadian French, Amharic, Hindi and Punjabi). The 2 forward translations will be  
56  
57

1  
2  
3 compared and reconciled. A back translation of the reconciled versions will be conducted and reviewed  
4  
5 by the research team. Harmonization of the multiple language versions will identify any discrepancies  
6  
7 across language which will then be addressed. Cognitive debriefing interviews with a small group of  
8  
9 children (at least 5) with lower limb deformities in each country will be conducted to determine  
10  
11 understandability, interpretation and cultural relevance of each translation. Translations will be revised  
12  
13 and finalized based on the feedback obtained.  
14  
15  
16  
17  
18  
19

20 **Phase 2:** How should we measure the concepts identified in Phase 1 and which questions are effective?  
21  
22

23  
24  
25 We will field test the new PRO instrument in a large sample of children and adolescents with lower limb  
26  
27 deformities in Canada, Ethiopia, India and the USA. The data collected will be analysed to examine scale  
28  
29 performance and to develop their scoring algorithms. We will use Rasch Measurement Theory (RMT)  
30  
31 analyse to examine item and scale performance against a set of psychometric criteria.<sup>[29–31]</sup> In the RMT  
32  
33 approach, scales are created along which an individual is placed based on the probability that the  
34  
35 respondent answered the items in a certain way. RMT scales provide interval level measurement, which  
36  
37 allows to accurately measure change over time.<sup>[32]</sup> A scale based on the RMT analysis will provide person  
38  
39 estimates which are independent of the sampling distribution of the items. The psychometric properties  
40  
41 of the scales will be defined using the RMT analysis.  
42  
43  
44  
45  
46

47 **Pilot Field Testing:** A preliminary RMT analysis will be conducted with the pilot field test data from the  
48  
49 Canadian and US centres to identify any changes needed prior to launching the international field test  
50  
51 study. Participants will also be asked to provide qualitative feedback on the new instrument specifically  
52  
53  
54  
55  
56  
57  
58  
59  
60

1  
2  
3 about the length of the instrument, anything in the instrument that they don't like and any other  
4  
5 comments on improving the instrument.  
6  
7  
8  
9  
10

11 **Study Participants:** Participant eligibility will be the same as in the qualitative phase.  
12  
13

14  
15  
16  
17 **Data Collection:** Participants will be invited to complete the new PRO instrument. Information on age at  
18 the time of data collection, sex, type of deformity and type and stage of treatment will also be collected.  
19  
20  
21  
22  
23

24  
25  
26 **Data Analysis:** The results from the RMT analyses and the qualitative feedback will be used to revise the  
27 scales.  
28  
29  
30

31  
32  
33  
34 **International Field Test and RMT analysis:** International field testing will be done at multiple centres to  
35 collect data from a large sample of children and adolescents with lower limb deformities.  
36  
37  
38  
39  
40  
41  
42

43 **Study Participants:** Participants from current collaborating centres and additional centres will be  
44 included. Eligibility criteria will be the same as in the qualitative interviews. Target sample size will be a  
45 minimum 108 – 200 participants per country in order to achieve item calibrations that are stable within  
46  
47  
48  
49 0.5 logits (person location estimates) with a 99% confidence interval.<sup>[33]</sup>  
50  
51  
52  
53  
54  
55  
56  
57  
58  
59  
60

1  
2  
3 **Data Collection:** Mode of data collection will be based at the discretion of each site and can  
4 include paper version or electronic with data entered directly into a REDCap.<sup>[34]</sup> Demographic data  
5 collected from each site will include age at the time of data collection, gender, ethnicity, country,  
6 language spoken, type of limb deformity, type and stage of treatment and any future treatment plans.  
7  
8  
9  
10  
11  
12  
13  
14  
15

16 **Data Analysis:** Data will be analysed using Rumm2030 software.<sup>[35]</sup> In RMT analysis, a number of tests  
17 and criteria are applied to examine item and scale performance. A) Threshold for item response options  
18 must be ordered i.e., a '1' on a 4 point scale must be lower on the continuum than a '2'. RMT analysis  
19 defines the hierarchy of items on the scale, from easiest question for a participant to endorse to hardest  
20 question to endorse. B) Item fit statistics will be used to evaluate whether the data fits the Rasch model.  
21 Three indicators of fit to be used are log residuals (item person interaction), chi-square values (item-trait  
22 interaction) and item characteristic curves<sup>[30,36]</sup>. These item fit statistics will be interpreted along with  
23 their clinical relevance. Items that do not fit these three criteria will be dropped unless they pertain to  
24 clinically important concepts. C) All items of a scale should define a continuum. Inspecting where items  
25 are located on the continuum in respect to the other items will indicate how well the items map out a  
26 particular construct. The range of construct measured by a scale will be compared to the range of the  
27 construct experienced by the target study population (scale to sample targeting).  
28  
29  
30  
31  
32  
33  
34  
35  
36  
37  
38  
39  
40  
41  
42  
43  
44  
45  
46

47 **Unidimensionality:** This will be checked to find out whether all the items on a scale measure only one  
48 common construct.<sup>[37]</sup> If the observed data (for each scale) from the field test fits the Rasch model, it will  
49 be assumed that the individual scales are unidimensional.  
50  
51  
52  
53  
54  
55  
56  
57  
58  
59  
60

1  
2  
3 **Internal Consistency Reliability:** This will measure how items are related to each other on a scale.

4  
5 Person Separation Index (PSI) will be used to measure the precision of a person estimate.<sup>[30]</sup>  
6  
7  
8  
9

10  
11 **Differential Item Functioning (DIF):** This test identifies items that perform differently (bias) for  
12  
13 subgroups within a sample. We will examine DIF by age-group, gender and country. When items are  
14  
15 significant for DIF, the measurement ruler is not stable across the subgroups.<sup>[29]</sup>  
16  
17  
18  
19  
20  
21

22 **Item Reduction:** The graphical and statistical tests described above will be examined together to identify  
23  
24 items with poor performance that could be dropped. Distribution of item locations and clinical relevance  
25  
26 of items will also guide decisions about item reduction. RMT analysis will also provide a scoring system  
27  
28 for the scale.  
29  
30  
31  
32  
33  
34

35 **Normative data :** Normative data scores for the field test participants will be calculated using the  
36  
37 scoring system. Normative data and associations between the demographic variables and the test scores  
38  
39 will be examined.  
40  
41  
42  
43  
44

45 **Construct validity:** This scale property will be examined by assessing the internal structure (structural  
46  
47 validity) of the new PRO instrument, internal relationships, hypothesis testing and cross-cultural  
48  
49 validity.<sup>[38]</sup> The internal structure (dimensionality) and cross-cultural validity (DIF) will be tested during  
50  
51 the RMT analysis. Specific a priori hypotheses include an indication of the expected direction and  
52  
53 magnitude of correlations or differences in responses obtained from certain patient groups.<sup>[39–41]</sup>  
54  
55  
56  
57  
58  
59  
60



1  
2  
3 Children and adolescents with untreated lower limb deformity will have a lower HRQOL as compared to  
4  
5 the children who have received treatment.  
6  
7  
8  
9

10 **Phase 3:** How does the instrument work?  
11

12  
13 This phase will involve further evaluation of measurement properties of the final version of the HRQOL  
14  
15 instrument including its reliability, validity and responsiveness.<sup>[41]</sup>  
16  
17  
18  
19  
20

21 **Study Participants:** The inclusion criteria for participants in this phase of the study will be the same as  
22  
23 the previous phases. For responsiveness, lower limb deformity participants that are undergoing limb  
24  
25 lengthening/deformity correction using various methods (eg, external fixator device, internal fixation,  
26  
27 epiphysiodesis or amputation) will be recruited from collaborating sites in Canada and USA.  
28  
29  
30  
31  
32  
33

34 **Test –retest reliability** will be established by asking participants to complete the new PRO instrument 2  
35  
36 weeks after the initial assessment. Intraclass correlation coefficient of 0.70 will be considered  
37  
38 acceptable for the scales being tested in participants whose leg condition is stable during the time  
39  
40 interval.<sup>[42]</sup>  
41  
42  
43  
44  
45  
46

47 **Construct validity** will be established by administering the new HRQOL instrument alongside a generic  
48  
49 HRQOL instrument measuring physical, social, emotional, school function.<sup>[43]</sup> Scores from the generic  
50  
51 PRO instrument measuring similar domains as the new PRO instrument will be expected to correlate  
52  
53 more strongly than domains measuring dissimilar constructs.  
54  
55  
56  
57  
58  
59  
60

1  
2  
3  
4  
5  
6 **Criterion validity** is the degree to which the scores from the new PRO instrument adequately reflect  
7  
8 a 'gold standard' instrument.<sup>[40]</sup> The aim of this analysis is to compare the new PRO with another  
9  
10 instrument used in the past in patients with lower limb conditions, i.e., the Lower Limb Outcomes  
11  
12 Questionnaire.<sup>[44]</sup> The lower limb outcomes questionnaire measures pain, stiffness, swelling and  
13  
14 function. We expect scores from the physical health sub-scale of the new PRO instrument to correlate  
15  
16 more with scores from the existing PRO instrument as compared to the correlation between other sub-  
17  
18 scales such as psychological health and social health.  
19  
20  
21  
22  
23  
24  
25

26 **Responsiveness** is the ability of the instrument to detect clinically meaningful change over time in the  
27  
28 construct being measured.<sup>[40]</sup> In order to assess the responsiveness of a PRO instrument, anchor based  
29  
30 and distribution based approaches are recommended.<sup>[45-48]</sup> RMT analysis allows for an increased  
31  
32 detection of responsiveness.<sup>[48]</sup> The participants will be asked to complete the new PRO instrument both  
33  
34 pre-operatively and an appropriate time post operatively to determine responsiveness.  
35  
36  
37  
38  
39  
40

41 For patient-based anchors, self-reported global assessment of change in their HRQOL will be used to  
42  
43 categorize patients into groups that reflect different amounts of change in their HRQOL. Patients will be  
44  
45 asked to classify them into three groups; no improvement, small improvement, medium improvement  
46  
47 and large improvement after removal of the external fixator. Minimally important difference will be  
48  
49 determined as average change (post minus pre) observed in the score on the new HRQOL instrument in  
50  
51 the small improvement group using the transformed Rasch scores. A distribution based approach will be  
52  
53 also be used. The Rasch scores before and after treatment will be compared using paired t-tests. An  
54  
55  
56  
57  
58  
59  
60

1  
2  
3 effect size and standardised response mean will be calculated to measure change.<sup>[45,48]</sup> Finally, the  
4  
5 significance of a person's own change will be calculated using individual person estimates, which are  
6  
7 associated with standard errors.<sup>[48]</sup>  
8  
9  
10  
11  
12

### 13 **Ethics**

14  
15  
16  
17 Ethics approval is obtained from the main study centre and from each of the participating sites. All  
18  
19 information collected is securely stored at institutional computers in password protected files.  
20

21 Maintaining patient confidentiality presents challenges in any qualitative research. However, in this study,  
22  
23 the authors will try to maintain patient confidentiality as much as possible. All qualitative data will be  
24  
25 clearly examined to remove any personally identifying information and will be stored securely at each of  
26  
27 the participating institutions.  
28  
29  
30  
31  
32  
33

34 Study participants may be asked to discuss about issues related to their limbs that are sensitive and  
35  
36 may trigger distress. In order to address this issue, participants are made aware of this during the  
37  
38 consenting process and are given an option to follow up with the study team.  
39  
40  
41  
42  
43  
44

### 45 **Dissemination**

46  
47  
48 This study will take an integrated knowledge translation approach. Collaborations with multiple sites  
49  
50 internationally will hopefully result in increased uptake and the use of this PRO instrument in the future.  
51  
52 The results of this study will be published in peer reviewed journals.  
53  
54  
55  
56  
57  
58  
59  
60

**Expected Outcome and Significance:** We expect to produce an international PRO instrument that is scientifically sound and clinically relevant for lower limb deformities. Once developed, we expect that this new PRO instrument will be used internationally by healthcare professionals and researchers to examine the effectiveness of interventions in terms improving the patient HRQOL.

## References

1. Weldring T, Smith MS. PROs and PROMs Health Services Insights Weldring. *Heal Serv Insights* 2013;(6):61–8.
2. Wild D, Grove A, Martin M, Eremenco S, McElroy S, Verjee-Lorenz A, et al. Principles of Good Practice for the Translation and Cultural Adaptation Process for Patient-Reported Outcomes (PRO) Measures: report of the ISPOR task force for translating adaptation. *Value Heal [Internet]* 2005;2(2):94–104. Available from: [http://www.ispor.org/workpaper/research\\_practices/pro\\_tca.asp](http://www.ispor.org/workpaper/research_practices/pro_tca.asp)
3. Reeve BB, Wyrwich KW, Wu AW, Velikova G, Terwee CB, Snyder CF, et al. ISOQOL recommends minimum standards for patient-reported outcome measures used in patient-centered outcomes and comparative effectiveness research. *Qual Life Res* 2013;
4. U.S. Food and Drug Administration. Guidance for industry: patient-reported outcome measures: use in medical product development to support labeling claims: draft guidance. *Health Qual Life Outcomes* 2006;4(79).
5. WHO. No Title [Internet]. [cited 2016 Nov 8];Available from: <http://www.who.int/healthinfo/survey/whoqol-qualityoflife/en/>
6. Calvert M, Blazeby J, Altman DG, Revicki DA, Moher D, Brundage MD, et al. Reporting of Patient-Reported Outcomes in Randomized Trials. *Jama [Internet]* 2013;309(8):814. Available from: <http://jama.jamanetwork.com/article.aspx?doi=10.1001/jama.2013.879>
7. Wild D, Eremenco S, Mear I, Martin M, Houchin C, Gawlicki M, et al. Wild et al. 2009\_Multinational trials-recommendations on the translations required, approaches to using the same language in different c. 2009;12(4):430–40.
8. Chhina H, Klassen A, Kopec J, Park S, Fortes C, Cooper A. Quality of life of children with lower limb deformities: A systematic review of patient-reported outcomes and development of a preliminary conceptual framework. *J Limb Lengthening Reconstr* 2017;3(1):19–29.
9. Milad Karimi JB. Health, Health-Related Quality of Life, and Quality of Life: What is the Difference? *Pharmacoeconomics* 2016;34(7):645–9.
10. Patrick DL, Burke LB, Gwaltney CJ, Leidy NK, Martin ML, Molsen E, et al. Content Validity—Establishing and Reporting the Evidence in Newly Developed Patient-Reported Outcomes (PRO)

- Instruments for Medical Product Evaluation: ISPOR PRO Good Research Practices Task Force Report: Part 1—Eliciting Concepts for a New PRO Instrument. *Value Heal* 2011;14(8):967–77.
11. Patrick DL, Burke LB, Gwaltney CJ, Leidy NK, Martin ML, Molsen E, et al. Content validity - Establishing and reporting the evidence in newly developed patient-reported outcomes (PRO) instruments for medical product evaluation: ISPOR PRO good research practices task force report: Part 2 - Assessing respondent understanding. *Value Heal* 2011;
  12. Matza LS, Patrick DL, Riley AW, Alexander JJ, Rajmil L, Pleil AM, et al. Pediatric patient-reported outcome instruments for research to support medical product labeling: Report of the ISPOR PRO good research practices for the assessment of children and adolescents task force. *Value Heal* [Internet] 2013;16(4):461–79. Available from: <http://dx.doi.org/10.1016/j.jval.2013.04.004>
  13. Creswell, J. W., Plano Clark, V. L., Gutmann, M., & Hanson W. *Advanced mixed methods research designs Handbook of mixed methods in social & behavioral research*. Thousand Oaks, CA: Sage.; 2003.
  14. Lasch KE, Marquis P, Vigneux M, Abetz L, Arnould B, Bayliss M, et al. PRO development: rigorous qualitative research as the crucial foundation. *Qual Life Res* [Internet] 2010;19(8):1087–96. Available from: <http://www.jstor.org.ezproxy.library.ubc.ca/stable/40927744>
  15. Bowen G a. Naturalistic inquiry and the saturation concept: a research note. *Qual Res* 2008;8(1):137–52.
  16. Clark CD. The Autodrive interview: A photographic viewfinder into children’s experience. *Vis Sociol* 1999;14(1):39–50.
  17. Thorne S, Kirkham SR, MacDonald-Emes J. Interpretive description: A noncategorical qualitative alternative for developing nursing knowledge. *Res Nurs Health* [Internet] 1997;20(2):169–77. Available from: [http://dx.doi.org/10.1002/\(SICI\)1098-240X\(199704\)20:2%3C169::AID-NUR9%3E3.0.CO;2-I](http://dx.doi.org/10.1002/(SICI)1098-240X(199704)20:2%3C169::AID-NUR9%3E3.0.CO;2-I)
  18. Thorne S. *Interpretive Description*. 2nd ed. 2016.
  19. Welford C, Murphy K, Casey D. Demystifying nursing research terminology: Part 2. *Nurse Res* 2012;
  20. Guba EG, Lincoln YS. *Effective Evaluation* [Internet]. 1981. Available from: <http://books.google.co.jp/books?id=3fxGAAAAMAAJ>
  21. Sandelowski. Problem of Rigour in Qualitative Research. *Adv Nurs Sci* 1986;8(3).
  22. Matza LS, Swensen AR, Flood EM, Secnik K, Leidy NK. Assessment of health-related life in children: a review of conceptual, methodological and regulatory issues *BT - Val Health*. 2004.
  23. Clark LA, Watson D. Constructing validity: Basic issues in objective scale development. *Psychol Assess* 1995;
  24. Borgers N, Hox J, Sikkels D. Response effects in surveys on children and adolescents: The effect of number of response options, negative wording, and neutral mid-point. *Qual Quant* 2004;
  25. Weijters B, Cabooter E, Schillewaert N. The effect of rating scale format on response styles: The

- number of response categories and response category labels. *Int J Res Mark* 2010;
26. Willis G. *Cognitive interviewing: A tool for improving questionnaire design*. Sage; 2005.
27. Willis GB. *Analysis of the Cognitive Interview in Questionnaire Design: Understanding Qualitative Research*. Oxford Univ Press 2015;1–275.
28. WHO. WHO (World Health Organization). Process of translation and adaptation of instruments [Internet]. [cited 2017 Jan 19]; Available from: [http://www.who.int/substance\\_abuse/research\\_tools/translation/en/](http://www.who.int/substance_abuse/research_tools/translation/en/)
29. Hobart J, Cano S. Improving the evaluation of therapeutic interventions in multiple sclerosis: the role of new psychometric methods. *Health Technol. Assess.* 2009;13(12).
30. Andrich D. *Rasch models for measurement*. Newbury Park, Ca: SAGE Publications, Inc; 1988.
31. Rasch G. Probabilistic Models for Some Intelligence and Attainment Tests. *Inf. Control* 1961;4:382.
32. Hobart JC. The problem with health measurement. 2011;279–90.
33. Linacrej. Sample size and item calibration stability. *Rasch Meas Trans* 1994;7(28).
34. Harris PA, Taylor R, Thielke R, Payne J, Gonzalez N, Conde JG. Research electronic data capture (REDCap)-A metadata-driven methodology and workflow process for providing translational research informatics support. *J Biomed Inform* 2009;42(2):377–81.
35. RUMM Lab. Welcome to RUMM. [Internet]. [cited 2017 Feb 1]; Available from: <http://www.rummlab.com.au/>
36. Wright B, G M. *Rating scale analysis: Rasch measurement*. Chicago:MESA: 1982.
37. Fayers APM, Hand DJ, Bjordal K, Groenvold M, Fayers PM, Hand DJ, et al. Causal Indicators in Quality of Life Research. *Qual Heal Res* 1997;6(5):393–406.
38. Cronbach LJ, Meehl PE. *Psychological Bulletin*. 1955;(4).
39. Strauss ME, Smith GT. Construct Validity : Advances in Theory and Methodology. *Rev, Annu Psychol, Clin* 2009;
40. Mokkink LB, Terwee CB, Knol DL, Stratford PW, Alonso J, Patrick DL, et al. The COSMIN checklist for evaluating the methodological quality of studies on measurement properties : A clarification of its content. *BMC Med Res Methodol* 2010;
41. Mokkink LB, Terwee CB, Patrick DL, Alonso J, Stratford W, Knol DL, et al. The COSMIN checklist for assessing the methodological quality of studies on measurement properties of health status measurement instruments : an international Delphi study. *Qual Life Res* 2010;19(4):539–49.
42. Giraudeau B, Mary JY. Planning a reproducibility study : how many subjects and how many replicates per subject for an expected width of the 95 per cent confidence interval of the intraclass correlation coefficient. *Stat Med* 2001;3214(January):3205–14.

- 1  
2  
3 43. Varni JW, Burwinkle TM, Katz ER, Meeske K, Dickinson P. The PedsQL™ in pediatric cancer:  
4 Reliability and validity of the Pediatric Quality of Life Inventory™ Generic Core Scales,  
5 Multidimensional Fatigue Scale, and Cancer Module. *Cancer* [Internet] 2002;94. Available from:  
6 <http://dx.doi.org/10.1002/cncr.10428>  
7  
8  
9 44. Johanson NA, Liang MH, Daltroy L, Rudicel S, Richmond J. American Academy of Orthopaedic  
10 Surgeons Lower Limb Outcomes Assessment Instruments. Reliability, Validity, and Sensitivity to  
11 Change. *J Bone Jt Surg* 2004;86(5).  
12  
13 45. Revicki D, Hays RD, Cella D, Sloan J. Recommended methods for determining responsiveness and  
14 minimally important differences for patient-reported outcomes. *J. Clin. Epidemiol.*2008;  
15  
16 46. Guyatt G, Walter S, Norman G. Measuring change over time: Assessing the usefulness of  
17 evaluative instruments. *J Chronic Dis* 1987;40(2):171–8.  
18  
19 47. Sprangers MA, Moinpour CM, Moynihan TJ, Patrick DL, Revicki DA. Assessing meaningful change  
20 in quality of life over time: a users' guide for clinicians. *Mayo Clin Proc* [Internet] 2002;77(6):561–  
21 71. Available from:  
22 [http://www.ncbi.nlm.nih.gov/entrez/query.fcgi?cmd=Retrieve&db=PubMed&dopt=Citation&list\\_](http://www.ncbi.nlm.nih.gov/entrez/query.fcgi?cmd=Retrieve&db=PubMed&dopt=Citation&list_oids=12059127)  
23 [\\_oids=12059127](http://www.ncbi.nlm.nih.gov/entrez/query.fcgi?cmd=Retrieve&db=PubMed&dopt=Citation&list_oids=12059127)  
24  
25 48. Hobart JC, Cano SJ, Thompson AJ. Effect sizes can be misleading : is it time to change the way we  
26 measure change ? *J Neurol Neurosurg Psychiatry* 2010;1044–9.  
27  
28  
29  
30  
31  
32  
33  
34  
35  
36  
37  
38  
39  
40  
41  
42  
43  
44  
45  
46  
47  
48  
49  
50  
51  
52  
53  
54  
55  
56  
57  
58  
59  
60

1  
2  
3 **Authors' contributions:**  
4

5  
6 HC, AK and AC designed the study and contributed towards the manuscript.  
7

8  
9  
10 JK, JO contributed towards the study design and manuscript.  
11

12  
13 All authors have read and approved the manuscript.  
14  
15

16  
17  
18  
19  
20 **Funding statement:**  
21

22  
23 This work is supported by Orthopaedics Research Excellence Funds, Department of Orthopaedics,  
24 University of British Columbia (Grant # 20R24312); Canadian Orthopaedics Association (FAS# F16-  
25  
26 05491).  
27  
28  
29  
30  
31  
32  
33  
34

35 **Conflict of Interest:** All authors declare that they have no competing interests.  
36  
37  
38  
39  
40  
41

42 **Data Sharing Statement:** There are no additional data to share.  
43  
44  
45  
46  
47

48 **Acknowledgements:**  
49

50  
51  
52 The authors acknowledge their collaborating centres for contributing patients with limb deformities  
53  
54 during various phases of data collection for this study.  
55  
56  
57  
58  
59  
60



1  
2  
3  
4  
5  
6  
7  
8  
9  
10  
11  
12  
13  
14  
15  
16  
17  
18  
19  
20  
21  
22  
23  
24  
25  
26  
27  
28  
29  
30  
31  
32  
33  
34  
35  
36  
37  
38  
39  
40  
41  
42  
43  
44  
45  
46  
47  
48  
49  
50  
51  
52  
53  
54  
55  
56  
57  
58  
59  
60

For peer review only

### Figure Legends

Figure 1 Flow diagram showing the multiphase mixed methods protocol to develop a patient-reported outcome instrument for children and adolescents with lower limb deformities. It is important to note that the process can be iterative and interactive as opposed to a strict linear process.

QUAN, quantitative study component; QUAL, qualitative study component.

This figure has been reproduced with permission from BMJ Open 2017;7(1)

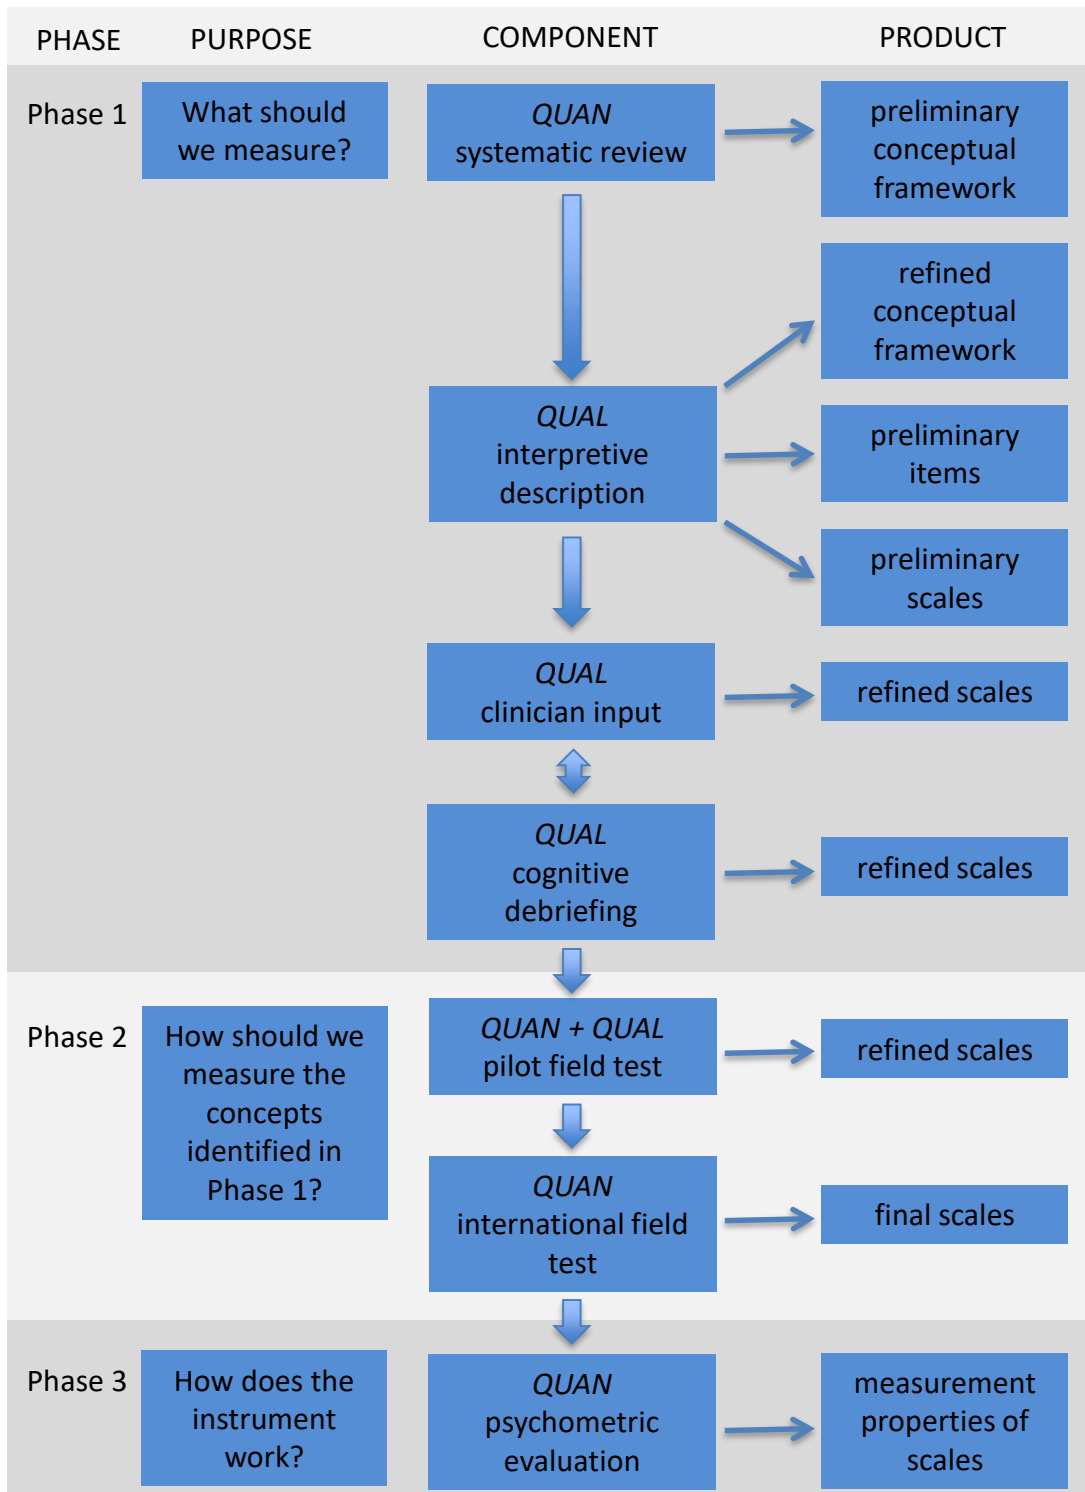

# BMJ Open

## An international multiphase mixed methods study protocol to develop a patient-reported outcome instrument for children and adolescents with lower limb deformities

|                                 |                                                                                                                                                                                                                                                                                                                                                          |
|---------------------------------|----------------------------------------------------------------------------------------------------------------------------------------------------------------------------------------------------------------------------------------------------------------------------------------------------------------------------------------------------------|
| Journal:                        | <i>BMJ Open</i>                                                                                                                                                                                                                                                                                                                                          |
| Manuscript ID                   | bmjopen-2018-027079.R1                                                                                                                                                                                                                                                                                                                                   |
| Article Type:                   | Protocol                                                                                                                                                                                                                                                                                                                                                 |
| Date Submitted by the Author:   | 05-Feb-2019                                                                                                                                                                                                                                                                                                                                              |
| Complete List of Authors:       | Chhina, Harpreet; BC Children's Hospital, Orthopaedics; University of British Columbia Faculty of Medicine, Experimental Medicine Klassen, Anne; McMaster University, Pediatrics Kopec, Jacek; Arthritis Research Centre of Canada, Oliffe, John; University of British Columbia School of Nursing Cooper, Anthony; BC Children's Hospital, Orthopaedics |
| <b>Primary Subject Heading</b>: | Paediatrics                                                                                                                                                                                                                                                                                                                                              |
| Secondary Subject Heading:      | Research methods                                                                                                                                                                                                                                                                                                                                         |
| Keywords:                       | Patient Reported Outcomes, Health Related Quality of life, Psychometrics, Lower Limb Deformities, Mixed Methods, QUALITATIVE RESEARCH                                                                                                                                                                                                                    |
|                                 |                                                                                                                                                                                                                                                                                                                                                          |

SCHOLARONE™  
Manuscripts

**TITLE PAGE**

**Title:** An international multiphase mixed methods study protocol to develop a patient-reported outcome instrument for children and adolescents with lower limb deformities

**Running Title:** Patient-reported outcome instrument for lower limb deformities

**Manuscript Type:** Study Protocol

**Abstract Word Count:** 300

**Manuscript Word Count:** 3846

**Name and order of Authors**

<sup>1,2</sup>Harpreet CHHINA, MSc

[hchhina@cw.bc.ca](mailto:hchhina@cw.bc.ca)

<sup>3</sup>Anne KLASSEN, BA, DPhil

[aklass@mcmaster.ca](mailto:aklass@mcmaster.ca)

<sup>4,5</sup>Jacek KOPEC, MD, MSc, PhD

[jkopec@arthritisresearch.ca](mailto:jkopec@arthritisresearch.ca)

<sup>6</sup>John L. OLIFFE, RN, Med, PhD

[John.Oliffe@nursing.ubc.ca](mailto:John.Oliffe@nursing.ubc.ca)

<sup>1,2,7</sup>Anthony COOPER, MBChB, FRCSC

[anthony.cooper@cw.bc.ca](mailto:anthony.cooper@cw.bc.ca)

**Author Affiliations**

<sup>1</sup>Department of Experimental Medicine, Faculty of Medicine, University of British Columbia

<sup>2</sup>BC Children's Hospital, Vancouver BC

<sup>3</sup>Department of Pediatrics, McMaster University

Clinical Epidemiology & Biostatistics McMaster University

Hamilton, ON Canada

<sup>4</sup>Research Centre of Canada, Richmond, BC, Canada

<sup>5</sup>School of Population and Public Health, University of British Columbia

Vancouver, BC Canada

<sup>6</sup>School of Nursing, University of British Columbia

Vancouver BC Canada

<sup>7</sup>Department of Orthopaedics, UBC

**Corresponding Author:** Anthony Cooper

1D 18 4480 Oak Street

BC Children's Hospital,

Vancouver BC V6H 2M2

Phone Number: 604-875-2000 ext. 6008

Fax Number: 604-875-2275

Email: [anthony.cooper@cw.bc.ca](mailto:anthony.cooper@cw.bc.ca)

**Keywords:** Patient reported outcome instrument, lower limb deformities, orthopaedics, qualitative research, mixed methods, children, adolescents, health related quality of life, psychometrics

**Institution where work was performed:** BC Children's Hospital, Vancouver BC, Canada

1  
2  
3 **Source of Funding:** Orthopaedics Research Excellence Funds, Department of Orthopaedics, University of  
4 British Columbia; Canadian Orthopaedics Association  
5

6 **Ethics:** This study is approved by Research Ethics Boards for each of the participating sites (CW15-  
7 0215/H15-00514, IRB #: 847125 Nemours/Alfred I. duPont Hospital for Children, 20160808-IRB, FWA  
8 00004545, IEC-01/20 17-579)  
9  
10  
11  
12  
13  
14  
15  
16  
17  
18  
19  
20  
21  
22  
23  
24  
25  
26  
27  
28  
29  
30  
31  
32  
33  
34  
35  
36  
37  
38  
39  
40  
41  
42  
43  
44  
45  
46  
47  
48  
49  
50  
51  
52  
53  
54  
55  
56  
57  
58  
59  
60

For peer review only

## Abstract

**Title:** An international multiphase mixed methods study protocol to develop a patient-reported outcome instrument for children and adolescents with lower limb deformities.

**Introduction:** Our recent systematic review has indicated the lack of a patient-reported outcome (PRO) instrument to measure HRQOL of children and adolescents with lower limb deformities. We are developing a PRO instrument which will be applicable internationally across various countries. This manuscript describes our approach to the development of a new PRO instrument for measuring HRQOL for children and adolescents with lower limb deformities.

**Methods and Analysis:** Three phases in the development of this PRO instrument are as described: 1) This phase involves the development of a conceptual framework of HRQOL and item pool that is used to inform a set of preliminary scales. We have developed a preliminary conceptual framework of HRQOL based on our systematic review. Qualitative interviews are being conducted at five sites in Canada, Ethiopia, India and the USA. An item pool will be generated from this qualitative phase. The preliminary items and scales will be sent out to children at the five participating centres. Cognitive debriefing interviews will gather detailed feedback on the items from the children. Expert opinion will be sought from clinicians from the participating centres. 2) During this phase, an international field-test study will be conducted to refine the scales and examine their psychometric properties. 3) During this phase, tests of reliability, validity and responsiveness will be conducted. Phases 1 will also involve translations and cultural adaptations.

At the end of this study, we expect to produce an internationally applicable PRO instrument which is scientifically sound and clinically relevant to the lower limb deformity population.

1  
2  
3 **Ethics and dissemination:** This study is approved by Research Ethics Boards for each of the participating  
4 sites.  
5  
6  
7  
8  
9  
10  
11  
12  
13  
14  
15  
16  
17  
18  
19  
20  
21  
22  
23  
24  
25  
26  
27  
28  
29  
30  
31  
32  
33  
34  
35  
36  
37  
38  
39  
40  
41  
42  
43  
44  
45  
46  
47  
48  
49  
50  
51  
52  
53  
54  
55  
56  
57  
58  
59  
60

For peer review only



1  
2  
3  
4  
5 Results of this study will be published in peer-reviewed journals and presented at national and  
6  
7 international conferences. An integrated knowledge translation approach is applied to engage patients,  
8  
9 families and clinicians from the start of the study.  
10  
11  
12  
13  
14

## 15 **Article Summary**

### 16 **Strengths and Limitations:**

- 17  
18  
19  
20 • International, multicentre, study including patients from high-income and lower-middle income  
21  
22 countries. This will ensure international applicability of this PRO instrument for children and  
23  
24 adolescents with lower limb deformities
- 25  
26  
27 • Rigorous qualitative component of this study will ensure content validity of this PRO instrument.
- 28  
29  
30 • Adherence to rigorous guidelines of PRO instrument development and the use of modern  
31  
32 psychometric methods will make this PRO instrument as scientifically sound and clinically relevant  
33  
34 as possible.
- 35  
36 • A long time period to completion is needed since this study involves multiple iterative steps  
37  
38 involving patients and clinicians from high-income and lower-middle income countries.  
39  
40  
41  
42  
43  
44  
45  
46  
47  
48  
49  
50  
51  
52  
53  
54  
55  
56  
57  
58  
59  
60

1  
2  
3  
4  
5 **Title:** An international multiphase mixed methods study protocol to develop a patient-reported outcome  
6 instrument for children and adolescents with lower limb deformities.  
7  
8  
9

10  
11  
12  
13 **Introduction:** The growing trend towards patient-centered care has led to increased use and  
14 development of patient reported outcome (PRO) instruments. PRO instruments measure concepts that  
15 matter to patients (eg, health-related quality of life, symptoms and function) from their perspective.<sup>[1]</sup>  
16 Guidelines exist to inform the development of a new PRO instrument, which can be a lengthy, rigorous  
17 and iterative process.<sup>[2-6]</sup> Most PRO instruments are developed in one language and in a single country.  
18 Subsequent versions are then translated and adapted for use in other countries when needed.<sup>[2,7]</sup> A  
19 methodologically stronger approach for internationally applicable measures is to develop a new PRO  
20 instrument internationally from the start. In this approach, both the qualitative data used to develop  
21 scales, and subsequent analysis to refine the scales, can be used to ensure that final content of a new  
22 PRO instrument covers the concerns of patients in different contexts and cultures.  
23  
24  
25  
26  
27  
28  
29  
30  
31  
32  
33  
34  
35  
36  
37  
38  
39

40 Lower limb deformities describe a range of conditions that may result from congenital defects in fetal  
41 development, or are acquired during growth.<sup>[8]</sup> They may also arise from trauma, infection, benign or  
42 malignant tumors, or other medical conditions. Lower limb deformities primarily include leg length  
43 discrepancy, lower limb deficiency, and associated angular and rotational deformities. Epidemiological  
44 data varies for each of these above mentioned conditions. Overall, the incidence of lower limb reduction  
45 defects is estimated to be 2 per 10, 000 live births in the USA.<sup>[9]</sup> Leg length discrepancy of greater than 2  
46 cm was found in at least one in every 1000 people as shown in a retrospective study from France.<sup>[10]</sup>  
47  
48  
49  
50  
51  
52  
53  
54  
55  
56  
57  
58  
59  
60

1  
2  
3 Children with lower limb deformities often have physical limitations, gait problems and may also  
4  
5 experience pain and discomfort. The abnormal appearance, function and hence the resulting  
6  
7 dissatisfaction can discourage participation in recreational and leisure activities in these children, which  
8  
9 can, consequently, be associated with behavioral, emotional, psychological, and social adjustment  
10  
11 problems.<sup>[11-14]</sup> The problems listed above, along with the complex and long treatment procedures  
12  
13 involved for lower limb deformities, can have a considerable effect on the health related quality of life  
14  
15 (HRQOL) of these children.<sup>[15-18]</sup>

16  
17  
18  
19 HRQOL is a multidimensional concept that measures a subject's perception of the effects of illness  
20  
21 and/or treatment(s) on their daily life, well-being, physical, psychological and social functioning.<sup>[3,19-21]</sup>

22  
23  
24  
25 For accurate measurement of concepts such as HRQOL, it is important to have psychometrically sound  
26  
27 (both reliable and valid) measurement instruments.

28  
29  
30 A systematic review indicated that no PRO instrument, exists to measure HRQOL for children and  
31  
32 adolescents with lower limb deformities.<sup>[22]</sup> Due to the lack of a condition specific PRO instrument for  
33  
34 lower limb deformities, the HRQOL of children with lower limb deformities has been measured by either  
35  
36 using a generic or a parent-reported HRQOL instrument.<sup>[22]</sup>

37  
38  
39  
40 To address this gap, our aim is to develop an internationally applicable PRO instrument to measure  
41  
42 HRQOL of children and adolescents with lower limb deformities. In this article, we describe our  
43  
44 methodology and progress to date.

45  
46  
47  
48 The HRQOL tool developed at the end of this project will help assess the baseline HRQOL of children  
49  
50 with lower limb deformities. In the long term, this tool will be used by health care professionals such as  
51  
52 orthopaedic surgeons, physiotherapists, occupational therapists, podiatrists, nurses and other  
53  
54 healthcare professionals involved in the care of children with limb deformities, to look at the  
55  
56

1  
2  
3 effectiveness of relevant interventions for these children in terms of improving their HRQOL. The  
4  
5 evidence generated by the long term use of this HRQOL instrument about the effectiveness of various  
6  
7 treatments will eventually help develop or modify interventions/treatment plans, health care services  
8  
9 and target care, to achieve a better HRQOL for children and adolescents with lower limb deformities.  
10  
11 The development of a PRO instrument will benefit future patients with lower limb deformities by  
12  
13 measuring their HRQOL and thus helping improve their health outcomes. This new PRO instrument will  
14  
15 also help healthcare professionals, patients and their families in making important decisions about  
16  
17 treatment choices, such as amputation versus reconstruction.  
18  
19  
20  
21  
22  
23  
24

25 **Methods:** We adhere to best practice guidelines for development of PRO instruments.<sup>[2-4,20,21,23]</sup> Our  
26  
27 team follows a mixed methods iterative approach (see Figure 1).<sup>[24]</sup> The qualitative phase will ensure  
28  
29 that the items generated are grounded in the experiences of the children and adolescents with lower  
30  
31 limb deformities and the psychometric analysis will determine how well the items measure the  
32  
33 construct of interest (COI). Three iterative and interactive phases involved include the following: 1)  
34  
35 development of a conceptual framework of HRQOL and item pool that is used to inform a set of  
36  
37 preliminary scales; 2) an international field-test study to refine the scales and examine their  
38  
39 psychometric properties ; and 3) further tests of reliability, validity and responsiveness (Figure 1).  
40  
41  
42  
43

44 **Patient and Public Involvement:** There was no direct patient and public involvement during the protocol  
45  
46 development. However, this study itself involves direct patient engagement.  
47  
48  
49  
50  
51

52 **Phase 1:** what should we measure?  
53  
54  
55  
56  
57  
58  
59  
60

1  
2  
3 This phase involves the development of a conceptual framework and generation of an item pool to  
4 inform scale development. This phase will establish content validity of the new instrument.<sup>[4,20]</sup> This  
5  
6 phase has three steps as explained below.  
7  
8  
9

10  
11  
12  
13  
14 **Step 1** involves development of a conceptual framework of HRQOL for children and adolescents with  
15 lower limb deformities (in progress).  
16  
17

18  
19  
20  
21  
22 **Systematic review:** We performed a systematic review to identify PRO instruments used to measure the  
23 HRQOL of children and adolescents with lower limb deformities. Findings were used to develop a  
24 preliminary conceptual framework.<sup>[22]</sup>  
25  
26  
27

28  
29  
30  
31  
32  
33 **Qualitative interviews:** Rigorous qualitative research is a crucial foundation in the development of PRO  
34 instruments.<sup>[25]</sup>  
35  
36  
37

38  
39  
40  
41 **Recruitment:** Participants are being recruited from 5 orthopaedic centres in high-income (Canada – two  
42 centres and USA), lower-middle income (India) and low-income countries (Ethiopia). Our aim is to recruit  
43 a maximum variation sample that differs by type of lower limb deformities, type and stage of treatment,  
44 age, gender and country. All interviews at one Canadian and one US English speaking centre and one  
45 Indian Hindi/Punjabi speaking centre are conducted by one lead interviewer (fluent in Punjabi, Hindi and  
46 English) at the main study site (the site where the first and the senior author are located). Interviews at  
47 the French speaking Canadian centre and Amharic speaking Ethiopian centre are conducted by local  
48  
49  
50  
51  
52  
53  
54  
55  
56  
57  
58  
59  
60

1  
2  
3 interviewers at those respective sites, trained by the lead interviewer at the main study site to ensure  
4  
5 uniformity during the interview process.  
6  
7  
8  
9

10 **Inclusion and exclusion criteria:** Participants are aged 8 to 18 years with any of the following congenital  
11  
12 or acquired lower limb conditions as diagnosed by an orthopaedic surgeon: lower limb reduction  
13  
14 defects, leg length discrepancy, and associated angular and rotational deformities. Isolated knee, foot  
15  
16 and ankle conditions without any limb length discrepancy or limb deformity are not included. Children  
17  
18 and adolescents with comorbidities that may have confounding effects on their HRQOL, and/or  
19  
20 cognitive or developmental delay that may affect their ability to communicate are excluded from this  
21  
22 study.  
23  
24  
25  
26  
27

28 An interview guide with open-ended questions and probes covering concepts from other PRO  
29  
30 instruments identified in the systematic review was developed.<sup>[22]</sup> The interview guide is modified after  
31  
32 each interview as needed to include new themes that are then raised in subsequent interviews. The  
33  
34 interview guide was prepared in English and translated into French, Amharic and Hindi/Punjabi. French  
35  
36 translations were done by the native French speaker who also conducted the interviews at the French  
37  
38 speaking site. Amharic translations were conducted by a native Amharic speaker who also conducted  
39  
40 the interviews at the Amharic speaking site. Hindi/Punjabi translations were conducted by the lead  
41  
42 interviewer who is a native Hindi/Punjabi speaker and also conducted interviews at the Hindi/Punjabi  
43  
44 speaking site. Interviews will be conducted until data saturation.<sup>[26]</sup>  
45  
46  
47  
48  
49  
50

51 **Data Collection:** Parent consent and participant assent is obtained from each family. Demographic (age,  
52  
53 gender, ethnicity) and clinical (diagnosis, type and stage of treatment) data are collected for each  
54  
55 participant. Individual face-to-face interviews are conducted with the participant and parent(s) where  
56  
57  
58  
59  
60

1  
2  
3 possible. Interviews are audio-recorded and transcribed/translated into English. English interviews are  
4  
5 transcribed by professional transcriptionist fluent in English. French interviews are translated and  
6  
7 transcribed by a professional bilingual transcriptionist. Amharic translation and transcription are  
8  
9 conducted by the same person conducting the interviews who is a native Amharic speaker.  
10  
11 Hindi/Punjabi interviews are translated and transcribed by the lead interviewer who is native speaker of  
12  
13 those languages.  
14  
15

16  
17  
18  
19  
20 Participants from the main study site in Canada are also invited to take part in photo elicitation  
21  
22 interview (PEI) whereby they are invited to take pictures to show how their life is affected by their leg  
23  
24 condition. These PEI using participant produced photographs will help us overcome any age related  
25  
26 linguistic and cognitive barriers in our young participants.<sup>[27]</sup>  
27  
28  
29  
30  
31  
32

33 **Data Analysis:** The qualitative methodology used is interpretive description (ID). ID is a ‘non-categorical  
34  
35 methodological approach’ that acknowledges the theoretical and practical knowledge that the  
36  
37 researchers bring to a project to generate relevant knowledge for a clinical context.<sup>[28,29]</sup> The underlying  
38  
39 qualitative paradigm is ‘pragmatism’ which means that an individual’s (patients’ and/or caregivers’)  
40  
41 understanding of a concept is of greatest importance in understanding the impact of their condition on  
42  
43 their HRQOL, regardless of the clinical explanations.<sup>[30]</sup>  
44  
45  
46  
47  
48

49 Interviews in English are transcribed verbatim. Interviews in other languages are transcribed and  
50  
51 translated into English. All data are analysed by one researcher at the main study site. A line-by-line  
52  
53 approach is used to code the data, with constant comparison methods to identify and categorize the  
54  
55 concepts of interest (COI). The identified concepts are categorised into overarching top-level domains  
56  
57  
58  
59  
60

1  
2  
3 and subdomains. Data collection and analysis is being conducted concurrently and iteratively. The  
4  
5 preliminary conceptual framework is revised based on the analyses.  
6  
7  
8  
9

10 **Rigour:** The truth value, applicability, consistency and neutrality will be assessed to establish rigour for  
11 the qualitative phase.<sup>[31,32]</sup> We use member checking as a way of establishing the truth value and  
12 credibility of our results. The applicability of the results will be determined in terms of fittingness of the  
13 quotations from the study participants to the scales derived from this data.<sup>[31]</sup> The scales will be taken  
14 back to the study participants for their feedback. The consistency of the qualitative findings will be  
15 evaluated by their auditability. Auditability will be maintained by keeping a clear decision trail during  
16 analysis. We will use confirmability as the criterion for neutrality, which means that we will be reflexive  
17 about the research process and the findings  
18  
19  
20  
21  
22  
23  
24  
25  
26  
27  
28  
29  
30

31 **Step 2** will involve item generation and scale development.  
32  
33  
34  
35  
36

37 **Item Generation:** Coded qualitative data will be used to generate a comprehensive item pool. In  
38 developing draft items, the wordings of patients will be used as much as possible to ensure that the  
39 items will resonate well with them. The item pool will be analysed to identify common/unique issues  
40 and how these vary by age (child vs adolescents), leg condition and country. We will follow guidelines in  
41 regards to appropriate health related vocabulary, reading level, response scale, response options, recall  
42 period, length of instrument.<sup>[23,33–36]</sup> We will use the item pool to create independently functioning  
43 scales that act like ‘rulers’ where the items map out a clinical hierarchy for each of the COI.  
44  
45  
46  
47  
48  
49  
50  
51  
52  
53  
54  
55  
56  
57  
58  
59  
60



1  
2  
3 **Step 3** will involve clinical input, cognitive debriefing interviews, and refining the scales.  
4  
5  
6  
7  
8

9 **Clinician Input:** Clinicians (orthopaedic surgeons, nurses, occupational therapists, physiotherapists,  
10 podiatrists and psychologists) and other experts (experts in HRQOL studies and measurement) will be  
11 invited to provide feedback on the scales using a Research Electronic Data Capture (REDCap) survey.  
12  
13  
14  
15

16  
17  
18  
19  
20 **Cognitive Debriefing Interviews:** Cognitive debriefing interviews with participants will be conducted to  
21 determine if patients understand the instructions, response options and items of the new HRQOL  
22 instrument and to identify missing content. Participants will review the HRQOL instrument with the  
23 interviewer using the 'Think Aloud' technique with verbal probing.<sup>[37,38]</sup> Interviews will take place in a  
24 series of rounds to allow time to make changes to the instrument and then obtain feedback on those  
25 changes. Interviews will start in English centres and continue until no further changes are needed.  
26  
27  
28  
29  
30  
31  
32  
33 Translated versions (pragmatic translations) of items and scales will be created (one country at a time)  
34 and cognitive debriefing interviews will be conducted in turn in French, Amharic, Hindi/Punjabi.  
35  
36  
37  
38  
39

40 **Translation and cultural adaption (TCA):** We will follow the principles of good practice for TCA for PRO  
41 instruments.<sup>[2,7,39]</sup> The first step will involve 2 independent forward translations from English to each  
42 target language (Canadian French, Amharic, Hindi and Punjabi). All translations will be conducted by the  
43 native speakers of that language who are also fluent in English. The 2 forward translations will be  
44 compared and reconciled. A back translation of the reconciled versions will be conducted by the native  
45 speakers of that language who are also fluent in English and reviewed by the research team (research  
46 team has members who are native speakers of English, French, Amharic, Hindi and Punjabi and are also  
47 fluent in English). Harmonization of the multiple language versions will identify any discrepancies across  
48  
49  
50  
51  
52  
53  
54  
55  
56  
57

1  
2  
3 language which will then be addressed. Cognitive debriefing interviews with a small group of children (at  
4  
5 least 5) with lower limb deformities in each country will be conducted to determine understandability,  
6  
7 interpretation and cultural relevance of each translation. Translations will be revised and finalized based  
8  
9 on the feedback obtained.  
10

11  
12  
13  
14  
15  
16 **Phase 2:** How should we measure the concepts identified in Phase 1 and which questions are effective?  
17

18  
19  
20 We will field test the new PRO instrument in a large sample of children and adolescents with lower limb  
21  
22 deformities in Canada, Ethiopia, India and the USA. The data collected will be analysed to examine scale  
23  
24 performance and to develop their scoring algorithms. We will use Rasch Measurement Theory (RMT)  
25  
26 analyse to examine item and scale performance against a set of psychometric criteria.<sup>[40–42]</sup> In the RMT  
27  
28 approach, scales are created along which an individual is placed based on the probability that the  
29  
30 respondent answered the items in a certain way. RMT scales provide interval level measurement, which  
31  
32 allows to accurately measure change over time.<sup>[43]</sup> A scale based on the RMT analysis will provide person  
33  
34 estimates which are independent of the sampling distribution of the items. The psychometric properties  
35  
36 of the scales will be defined using the RMT analysis.  
37  
38  
39  
40  
41  
42

43 **Pilot Field Testing:** A preliminary RMT analysis will be conducted with the pilot field test data from the  
44  
45 Canadian and US centres to identify any changes needed prior to launching the international field test  
46  
47 study. Participants will also be asked to provide qualitative feedback on the new instrument specifically  
48  
49 about the length of the instrument, anything in the instrument that they don't like and any other  
50  
51 comments on improving the instrument.  
52  
53  
54  
55  
56  
57  
58  
59  
60

1  
2  
3 **Study Participants:** Participant eligibility will be the same as in the qualitative phase.  
4  
5  
6  
7  
8

9 **Data Collection:** Participants will be invited to complete the new PRO instrument. Information on age at  
10  
11 the time of data collection, sex, type of deformity and type and stage of treatment will also be collected.  
12  
13

14  
15  
16  
17 **Data Analysis:** The results from the RMT analyses and the qualitative feedback will be used to revise the  
18  
19 scales.  
20  
21  
22  
23  
24  
25

26 **International Field Test and RMT analysis:** International field testing will be done at multiple centres to  
27  
28 collect data from a large sample of children and adolescents with lower limb deformities.  
29  
30  
31  
32  
33

34 **Study Participants:** Participants from current collaborating centres and additional centres will be  
35  
36 included. Eligibility criteria will be the same as in the qualitative interviews. Target sample size will be a  
37  
38 minimum 108 – 200 participants per country in order to achieve item calibrations that are stable within  
39  
40 0.5 logits (person location estimates) with a 99% confidence interval.<sup>[44]</sup>  
41  
42  
43  
44  
45  
46

47 **Data Collection:** Mode of data collection will be based at the discretion of each site and can include  
48  
49 paper version or electronic with data entered directly into a REDCap.<sup>[45]</sup> Demographic data collected  
50  
51 from each site will include age at the time of data collection, gender, ethnicity, country, language  
52  
53 spoken, type of limb deformity, type and stage of treatment and any future treatment plans.  
54  
55  
56  
57  
58  
59  
60

1  
2  
3  
4  
5  
6 **Data Analysis:** Data will be analysed using Rumm2030 software.<sup>[46]</sup> In RMT analysis, a number of tests  
7  
8 and criteria are applied to examine item and scale performance. A) Threshold for item response options  
9  
10 must be ordered i.e., a '1' on a 4 point scale must be lower on the continuum than a '2'. RMT analysis  
11  
12 defines the hierarchy of items on the scale, from easiest question for a participant to endorse to hardest  
13  
14 question to endorse. B) Item fit statistics will be used to evaluate whether the data fits the Rasch model.  
15  
16 Three indicators of fit to be used are log residuals (item person interaction), chi-square values (item-trait  
17  
18 interaction) and item characteristic curves<sup>[41,47]</sup>. These item fit statistics will be interpreted along with  
19  
20 their clinical relevance. Items that do not fit these three criteria will be dropped unless they pertain to  
21  
22 clinically important concepts. C) All items of a scale should define a continuum. Inspecting where items  
23  
24 are located on the continuum in respect to the other items will indicate how well the items map out a  
25  
26 particular construct. The range of construct measured by a scale will be compared to the range of the  
27  
28 construct experienced by the target study population (scale to sample targeting).  
29  
30  
31  
32  
33  
34  
35  
36

37 **Unidimensionality:** This will be checked to find out whether all the items on a scale measure only one  
38  
39 common construct.<sup>[48]</sup> If the observed data (for each scale) from the field test fits the rasch model, it will  
40  
41 be assumed that the individual scales are unidimensional.  
42  
43  
44  
45  
46  
47

48 **Internal Consistency Reliability:** This will measure how items are related to each other on a scale.  
49  
50 Person Separation Index (PSI) will be used to measure the precision of a person estimate.<sup>[41]</sup>  
51  
52  
53  
54  
55  
56  
57  
58  
59  
60

1  
2  
3 **Differential Item Functioning (DIF):** This test identifies items that perform differently (bias) for  
4 subgroups within a sample. We will examine DIF by age-group, gender and country. When items are  
5 significant for DIF, the measurement ruler is not stable across the subgroups.<sup>[40]</sup>  
6  
7  
8  
9

10  
11  
12  
13 **Item Reduction:** The graphical and statistical tests described above will be examined together to identify  
14 items with poor performance that could be dropped. Distribution of item locations and clinical relevance  
15 of items will also guide decisions about item reduction. RMT analysis will also provide a scoring system  
16 for the scale.  
17  
18  
19  
20  
21  
22

23  
24  
25  
26 **Normative data :** Normative data scores for the field test participants will be calculated using the  
27 scoring system. Normative data and associations between the demographic variables and the test scores  
28 will be examined.  
29  
30  
31  
32

33  
34  
35  
36 **Construct validity:** This scale property will be examined by assessing the internal structure (structural  
37 validity) of the new PRO instrument, internal relationships, hypothesis testing and cross-cultural  
38 validity.<sup>[49]</sup> The internal structure (dimensionality) and cross-cultural validity (DIF) will be tested during  
39 the RMT analysis. Specific a priori hypotheses include an indication of the expected direction and  
40 magnitude of correlations or differences in responses obtained from certain patient groups.<sup>[50-52]</sup>  
41  
42  
43  
44  
45  
46  
47  
48  
49  
50  
51  
52  
53  
54  
55  
56  
57  
58  
59  
60

**Phase 3:** How does the instrument work?

1  
2  
3 This phase will involve further evaluation of measurement properties of the final version of the HRQOL  
4 instrument including its reliability, validity and responsiveness.<sup>[52]</sup>  
5  
6  
7  
8  
9  
10

11 **Study Participants:** The inclusion criteria for participants in this phase of the study will be the same as  
12 the previous phases. For responsiveness, lower limb deformity participants that are undergoing limb  
13 lengthening/deformity correction using various methods (e.g., external fixator device, internal fixation,  
14 epiphysiodesis or amputation) will be recruited from collaborating sites in Canada and USA.  
15  
16  
17  
18  
19  
20  
21  
22  
23

24 **Test –retest reliability** will be established by asking participants to complete the new PRO instrument 2  
25 weeks after the initial assessment. Intraclass correlation coefficient of 0.70 will be considered  
26 acceptable for the scales being tested in participants whose leg condition is stable during the time  
27 interval.<sup>[53]</sup>  
28  
29  
30  
31  
32  
33  
34  
35  
36

37 **Construct validity** will be established by administering the new HRQOL instrument alongside the  
38 PedsQL, a generic HRQOL instrument measuring physical, social, emotional, school function.<sup>[54]</sup> Scores  
39 from the generic PRO instrument measuring similar domains as the new PRO instrument will be  
40 expected to correlate more strongly than domains measuring dissimilar constructs.  
41  
42  
43  
44  
45  
46  
47  
48  
49

50 **Criterion validity** is the degree to which the scores from the new PRO instrument adequately reflect a  
51 ‘gold standard’ instrument.<sup>[51]</sup> The aim of this analysis is to compare the new PRO with another  
52 instrument used in the past in patients with lower limb conditions, i.e., the Lower Limb Outcomes  
53  
54  
55  
56  
57  
58  
59  
60

1  
2  
3 Questionnaire.<sup>[55]</sup> The lower limb outcomes questionnaire measures pain, stiffness, swelling and  
4  
5 function. We expect scores from the physical health sub-scale of the new PRO instrument to correlate  
6  
7 more with scores from the existing PRO instrument as compared to the correlation between other sub-  
8  
9 scales such as psychological health and social health.  
10  
11  
12  
13  
14  
15

16 **Responsiveness** is the ability of the instrument to detect clinically meaningful change over time in the  
17  
18 construct being measured.<sup>[51]</sup> In order to assess the responsiveness of a PRO instrument, anchor based  
19  
20 and distribution based approaches are recommended.<sup>[56–59]</sup> RMT analysis allows for an increased  
21  
22 detection of responsiveness.<sup>[59]</sup> The participants will be asked to complete the new PRO instrument both  
23  
24 pre-operatively and an appropriate time post operatively to determine responsiveness.  
25  
26  
27  
28  
29  
30

31 For patient-based anchors, self- reported global assessment of change in their HRQOL will be used to  
32  
33 categorize patients into groups that reflect different amounts of change in their HRQOL. Patients will be  
34  
35 asked to classify them into four groups; no improvement, small improvement, medium improvement  
36  
37 and large improvement after removal of the external fixator. Minimally important difference will be  
38  
39 determined as average change (post minus pre) observed in the score on the new HRQOL instrument in  
40  
41 the small improvement group using the transformed Rasch scores. A distribution based approach will be  
42  
43 used. The Rasch scores before and after treatment will be compared using paired t-tests. An effect size  
44  
45 and standardised response mean will be calculated to measure change.<sup>[56,59]</sup> Finally, the significance of a  
46  
47 person's own change will be calculated using individual person estimates, which are associated with  
48  
49 standard errors.<sup>[59]</sup>  
50  
51  
52  
53  
54  
55  
56  
57  
58  
59  
60

## Ethics

Ethics approval is obtained from the main study centre and from each of the participating sites (The University of British Columbia / Children's and Women's Health Centre of British Columbia Research Ethics Board; Institutional review Board at Nemours/Alfred I. duPont Hospital for Children; McGill Faculty of Medicine, Institutional review Board; CURE International Internal Board Review (IRB); institutional Ethics Committee postgraduate Institute of Medical Education and Research, Chandigarh).

All information collected is securely stored at institutional computers in password protected files.

Maintaining patient confidentiality presents challenges in any qualitative research. However, in this study, the authors will try to maintain patient confidentiality as much as possible. All qualitative data will be clearly examined to remove any personally identifying information and will be stored securely at each of the participating institutions.

Study participants may be asked to discuss about issues related to their limbs that are sensitive and may trigger distress. In order to address this issue, participants are made aware of this during the consenting process and are given an option to follow up with the study team.

## Dissemination

This study will take an integrated knowledge translation approach. Collaborations with multiple sites internationally will hopefully result in increased uptake and the use of this PRO instrument in the future.

The results of this study will be published in peer reviewed journals.



1  
2  
3 **Expected Outcome and Significance:** We expect to produce an international PRO instrument that is  
4 scientifically sound and clinically relevant for lower limb deformities. Once developed, we expect that  
5 this new PRO instrument will be used internationally by healthcare professionals and researchers to  
6 examine the effectiveness of interventions in terms of improving the patient HRQOL.  
7  
8  
9  
10  
11  
12  
13  
14  
15  
16  
17  
18  
19  
20  
21  
22  
23  
24  
25  
26  
27  
28  
29  
30  
31  
32  
33  
34  
35  
36  
37  
38  
39  
40  
41  
42  
43  
44  
45  
46  
47  
48  
49  
50  
51  
52  
53  
54  
55  
56  
57  
58  
59  
60

For peer review only

## References

1. Weldring T, Smith MS. PROs and PROMs Health Services Insights Weldring. *Heal Serv Insights* 2013;(6):61–8.
2. Wild D, Grove A, Martin M, Eremenco S, McElroy S, Verjee-Lorenz A, et al. Principles of Good Practice for the Translation and Cultural Adaptation Process for Patient-Reported Outcomes (PRO) Measures: report of the ISPOR task force for translating adaptation. *Value Heal [Internet]* 2005;2(2):94–104. Available from:[http://www.ispor.org/workpaper/research\\_practices/pro\\_tca.asp](http://www.ispor.org/workpaper/research_practices/pro_tca.asp)
3. Reeve BB, Wyrwich KW, Wu AW, Velikova G, Terwee CB, Snyder CF, et al. ISOQOL recommends minimum standards for patient-reported outcome measures used in patient-centered outcomes and comparative effectiveness research. *Qual Life Res* 2013;
4. U.S. Food and Drug Administration. Guidance for industry: patient-reported outcome measures: use in medical product development to support labeling claims: draft guidance. *Health Qual Life Outcomes* 2006;4(79).
5. WHO. No Title [Internet]. [cited 2016 Nov 8]; Available from: <http://www.who.int/healthinfo/survey/whoqol-qualityoflife/en/>
6. Calvert M, Blazeby J, Altman DG, Revicki DA, Moher D, Brundage MD, et al. Reporting of Patient-Reported Outcomes in Randomized Trials. *Jama [Internet]* 2013;309(8):814. Available from: <http://jama.jamanetwork.com/article.aspx?doi=10.1001/jama.2013.879>
7. Wild D, Eremenco S, Mear I, Martin M, Houchin C, Gawlicki M, et al. Wild et al. 2009\_Multinational trials-recommendations on the translations required, approaches to using the same language in different c. 2009;12(4):430–40.
8. Wilson GN. Heritable limb deficiencies. In: Herring JA, Birch JG, editors. *The Child With a Limb Deficiency*. Rosemont, IL: American Academy of Orthopaedic Surgeons.; 1998. page 39–51.
9. Canfield MA, Honein MA, Yuskiv N, Xing J, Mai CT, Collins JS, et al. National estimates and race/ethnic-specific variation of selected birth defects in the United States, 1999–2001. *Birth Defects Res Part A - Clin Mol Teratol* 2006;76(11):747–56.
10. Guichet J-M, Spivak JM, Trouilloud P, Grammont PM. Lower Limb-Length Discrepancy. An Epidemiologic Study. *Clin. Orthop. Relat. Res.* 1991;272:235–41.
11. Setoguchi Y, Rosenfelder R. *The limb deficient child*. Springfield, IL: 1982.
12. Cadman D, Boyle M, Szatmari P, Offord DR. Chronic Illness, Disability, and Mental and Social Well-Being: Findings of the Ontario Child Health Study [Internet]. 1987;79(5):805–13. Available from: <http://pediatrics.aappublications.org/content/79/5/805.abstract>
13. Michielsen A, Wijk I Van, Ketelaar M. Participation and health-related quality of life of Dutch children and adolescents with congenital lower limb deficiencies. *J Rehabil Med*

- 2011;43(19):584–9.
14. Michielsen A, Wijk I Van, Ketelaar M. Participation and quality of life in children and adolescents with congenital limb deficiencies: A narrative review. *Prosthet Orthot Int* 2010;
  15. Hrutkay JM, Eilert RE. Operative Lengthening of the Lower Extremity and Associated Psychological Aspects: The Children’s Hospital Experience. *J Pediatr Orthop* 1990;10:373–7.
  16. Ghoneem HF, Wright JG, Cole WG, Rang M. The Ilizarov Method for Correction of Complex Deformities. *J Bone Jt Surgery, Am Vol* 1996;78:1480–5.
  17. Ramaker RR, Lagro SW, van Roermund PM, Sinnema G. The psychological and social functioning of 14 children and 12 adolescents after Ilizarov leg lengthening. *Acta Orthop Scand* 2000;71(1):55–9.
  18. Montpetit K, Hamdy RC, Dahan-oliel N, Zhang X, Narayanan UG, Frcs C. Measurement of Health-related Quality of Life in Children Undergoing External Fixator Treatment for Lower Limb Deformities. *J Pediatr Orthop* 2009;29(8):920–6.
  19. Milad Karimi JB. Health, Health-Related Quality of Life, and Quality of Life: What is the Difference? *Pharmacoeconomics* 2016;34(7):645–9.
  20. Patrick DL, Burke LB, Gwaltney CJ, Leidy NK, Martin ML, Molsen E, et al. Content Validity—Establishing and Reporting the Evidence in Newly Developed Patient-Reported Outcomes (PRO) Instruments for Medical Product Evaluation: ISPOR PRO Good Research Practices Task Force Report: Part 1—Eliciting Concepts for a New PRO Instrument. *Value Heal* 2011;14(8):967–77.
  21. Patrick DL, Burke LB, Gwaltney CJ, Leidy NK, Martin ML, Molsen E, et al. Content validity - Establishing and reporting the evidence in newly developed patient-reported outcomes (PRO) instruments for medical product evaluation: ISPOR PRO good research practices task force report: Part 2 - Assessing respondent understanding. *Value Heal* 2011;
  22. Chhina H, Klassen A, Kopec J, Park S, Fortes C, Cooper A. Quality of life of children with lower limb deformities: A systematic review of patient-reported outcomes and development of a preliminary conceptual framework. *J Limb Lengthening Reconstr* 2017;3(1):19–29.
  23. Matza LS, Patrick DL, Riley AW, Alexander JJ, Rajmil L, Pleil AM, et al. Pediatric patient-reported outcome instruments for research to support medical product labeling: Report of the ISPOR PRO good research practices for the assessment of children and adolescents task force. *Value Heal [Internet]* 2013;16(4):461–79. Available from: <http://dx.doi.org/10.1016/j.jval.2013.04.004>
  24. Creswell, J. W., Plano Clark, V. L., Gutmann, M., & Hanson W. *Advanced mixed methods research designs Handbook of mixed methods in social & behavioral research*. Thousand Oaks, CA: Sage.; 2003.
  25. Lasch KE, Marquis P, Vigneux M, Abetz L, Arnould B, Bayliss M, et al. PRO development: rigorous qualitative research as the crucial foundation. *Qual Life Res [Internet]* 2010;19(8):1087–96. Available from: <http://www.jstor.org.ezproxy.library.ubc.ca/stable/40927744>
  26. Bowen G a. Naturalistic inquiry and the saturation concept: a research note. *Qual Res* 2008;8(1):137–52.

- 1
  - 2
  - 3
  - 4
  - 5
  - 6
  - 7
  - 8
  - 9
  - 10
  - 11
  - 12
  - 13
  - 14
  - 15
  - 16
  - 17
  - 18
  - 19
  - 20
  - 21
  - 22
  - 23
  - 24
  - 25
  - 26
  - 27
  - 28
  - 29
  - 30
  - 31
  - 32
  - 33
  - 34
  - 35
  - 36
  - 37
  - 38
  - 39
  - 40
  - 41
  - 42
  - 43
  - 44
  - 45
  - 46
  - 47
  - 48
  - 49
  - 50
  - 51
  - 52
  - 53
  - 54
  - 55
  - 56
  - 57
  - 58
  - 59
  - 60
27. Clark CD. The Autodriven interview: A photographic viewfinder into children's experience. *Vis Sociol* 1999;14(1):39–50.
28. Thorne S, Kirkham SR, MacDonald-Emes J. Interpretive description: A noncategorical qualitative alternative for developing nursing knowledge. *Res Nurs Health [Internet]* 1997;20(2):169–77. Available from: [http://dx.doi.org/10.1002/\(SICI\)1098-240X\(199704\)20:2%3C169::AID-NUR9%3E3.0.CO;2-I](http://dx.doi.org/10.1002/(SICI)1098-240X(199704)20:2%3C169::AID-NUR9%3E3.0.CO;2-I)
29. Thorne S. *Interpretive Description*. 2nd ed. 2016.
30. Welford C, Murphy K, Casey D. Demystifying nursing research terminology: Part 2. *Nurse Res* 2012;
31. Guba EG, Lincoln YS. *Effective Evaluation [Internet]*. 1981. Available from: <http://books.google.co.jp/books?id=3fxGAAAAMAAJ>
32. Sandelowski. Problem of Rigour in Qualitative Research. *Adv Nurs Sci* 1986;8(3).
33. Matza LS, Swensen AR, Flood EM, Secnik K, Leidy NK. Assessment of health-related life in children: a review of conceptual, methodological and regulatory issues *BT - Val Health*. 2004.
34. Clark LA, Watson D. Constructing validity: Basic issues in objective scale development. *Psychol Assess* 1995;
35. Borgers N, Hox J, Sikkel D. Response effects in surveys on children and adolescents: The effect of number of response options, negative wording, and neutral mid-point. *Qual Quant* 2004;
36. Weijters B, Cabooter E, Schillewaert N. The effect of rating scale format on response styles: The number of response categories and response category labels. *Int J Res Mark* 2010;
37. Willis G. *Cognitive interviewing: A tool for improving questionnaire design*. Sage; 2005.
38. Willis GB. *Analysis of the Cognitive Interview in Questionnaire Design: Understanding Qualitative Research*. Oxford Univ Press 2015;1–275.
39. WHO. WHO (World Health Organization). Process of translation and adaptation of instruments [Internet]. [cited 2017 Jan 19]; Available from: [http://www.who.int/substance\\_abuse/research\\_tools/translation/en/](http://www.who.int/substance_abuse/research_tools/translation/en/)
40. Hobart J, Cano S. Improving the evaluation of therapeutic interventions in multiple sclerosis: the role of new psychometric methods. *Health Technol. Assess.* 2009;13(12).
41. Andrich D. *Rasch models for measurement*. Newbury Park, Ca: SAGE Publications, Inc; 1988.
42. Rasch G. Probabilistic Models for Some Intelligence and Attainment Tests. *Inf. Control* 1961;4:382.
43. Hobart JC. The problem with health measurement. 2011;279–90.
44. Linacrej. Sample size and item calibration stability. *Rasch Meas Trans* 1994;7(28).
45. Harris PA, Taylor R, Thielke R, Payne J, Gonzalez N, Conde JG. Research electronic data capture

- (REDCap)-A metadata-driven methodology and workflow process for providing translational research informatics support. *J Biomed Inform* 2009;42(2):377–81.
46. RUMM Lab. Welcome to RUMM. [Internet]. [cited 2017 Feb 1]; Available from: <http://www.rummlab.com.au/>
47. Wright B, G M. Rating scale analysis: Rasch measurement. Chicago:MESA: 1982.
48. Fayers APM, Hand DJ, Bjordal K, Groenvold M, Fayers PM, Hand DJ, et al. Causal Indicators in Quality of Life Research. *Qual Heal Res* 1997;6(5):393–406.
49. Cronbach LJ, Meehl PE. *Psychological Bulletin*. 1955;(4).
50. Strauss ME, Smith GT. Construct Validity : Advances in Theory and Methodology. *Rev, Annu Psychol, Clin* 2009;
51. Mokkink LB, Terwee CB, Knol DL, Stratford PW, Alonso J, Patrick DL, et al. The COSMIN checklist for evaluating the methodological quality of studies on measurement properties : A clarification of its content. *BMC Med Res Methodol* 2010;
52. Mokkink LB, Terwee CB, Patrick DL, Alonso J, Stratford W, Knol DL, et al. The COSMIN checklist for assessing the methodological quality of studies on measurement properties of health status measurement instruments : an international Delphi study. *Qual Life Res* 2010;19(4):539–49.
53. Giraudeau B, Mary JY. Planning a reproducibility study : how many subjects and how many replicates per subject for an expected width of the 95 per cent confidence interval of the intraclass correlation coefficient. *Stat Med* 2001;3214(January):3205–14.
54. Varni JW, Burwinkle TM, Katz ER, Meeske K, Dickinson P. The PedsQL™ in pediatric cancer: Reliability and validity of the Pediatric Quality of Life Inventory™ Generic Core Scales, Multidimensional Fatigue Scale, and Cancer Module. *Cancer [Internet]* 2002;94. Available from: <http://dx.doi.org/10.1002/cncr.10428>
55. Johanson NA, Liang MH, Daltroy L, Rudicel S, Richmond J. American Academy of Orthopaedic Surgeons Lower Limb Outcomes Assessment Instruments. Reliability, Validity, and Sensitivity to Change. *J Bone Jt Surg* 2004;86(5).
56. Revicki D, Hays RD, Cella D, Sloan J. Recommended methods for determining responsiveness and minimally important differences for patient-reported outcomes. *J. Clin. Epidemiol.* 2008;
57. Guyatt G, Walter S, Norman G. Measuring change over time: Assessing the usefulness of evaluative instruments. *J Chronic Dis* 1987;40(2):171–8.
58. Sprangers MA, Moinpour CM, Moynihan TJ, Patrick DL, Revicki DA. Assessing meaningful change in quality of life over time: a users' guide for clinicians. *Mayo Clin Proc [Internet]* 2002;77(6):561–71. Available from: [http://www.ncbi.nlm.nih.gov/entrez/query.fcgi?cmd=Retrieve&db=PubMed&dopt=Citation&list\\_uids=12059127](http://www.ncbi.nlm.nih.gov/entrez/query.fcgi?cmd=Retrieve&db=PubMed&dopt=Citation&list_uids=12059127)
59. Hobart JC, Cano SJ, Thompson AJ. Effect sizes can be misleading : is it time to change the way we measure change ? *J Neurol Neurosurg Psychiatry* 2010;1044–9.

1  
2  
3  
4  
5 **Authors' contributions:**  
6

7  
8 HC, AK and AC designed the study and contributed towards the manuscript.  
9

10  
11 JK, JO contributed towards the study design and manuscript.  
12  
13

14  
15 All authors have read and approved the manuscript.  
16  
17  
18  
19  
20  
21

22 **Funding statement:**  
23

24  
25 This work is supported by Orthopaedics Research Excellence Funds, Department of Orthopaedics,  
26  
27 University of British Columbia (Grant # 20R24312); Canadian Orthopaedics Association (FAS# F16-  
28  
29 05491).  
30  
31  
32  
33  
34  
35  
36

37 **Conflict of Interest:** All authors declare that they have no competing interests.  
38  
39  
40  
41  
42  
43

44 **Data Sharing Statement:** There are no additional data to share.  
45  
46  
47  
48  
49  
50  
51  
52  
53  
54  
55  
56  
57  
58  
59  
60

1  
2  
3  
4  
5  
6  
7  
8  
9  
10  
11  
12  
13  
14  
15  
16  
17  
18  
19  
20  
21  
22  
23  
24  
25  
26  
27  
28  
29  
30  
31  
32  
33  
34  
35  
36  
37  
38  
39  
40  
41  
42  
43  
44  
45  
46  
47  
48  
49  
50  
51  
52  
53  
54  
55  
56  
57  
58  
59  
60

**Acknowledgements:**

The authors acknowledge their collaborating centres for contributing patients with limb deformities during various phases of data collection for this study.

For peer review only

## Figure Legends

Figure 1 Flow diagram showing the multiphase mixed methods protocol to develop a patient-reported outcome instrument for children and adolescents with lower limb deformities. It is important to note that the process can be iterative and interactive as opposed to a strict linear process.

QUAN, quantitative study component; QUAL, qualitative study component.

This figure has been reproduced with permission from BMJ Open 2017;7(1)





Supplement: bmjopen-2018-027079.draft_revisions.pdf [file bmjopen-2018-027079.draft_revisions.pdf]
